# Supplementary material for: Diurnal changes of the oral microbiome in patients with alcohol dependence
Source: PubMed Central journal article supplement (PMC9791055; doi:10.3389/fcimb.2022.1068908), 2022-12-12

A

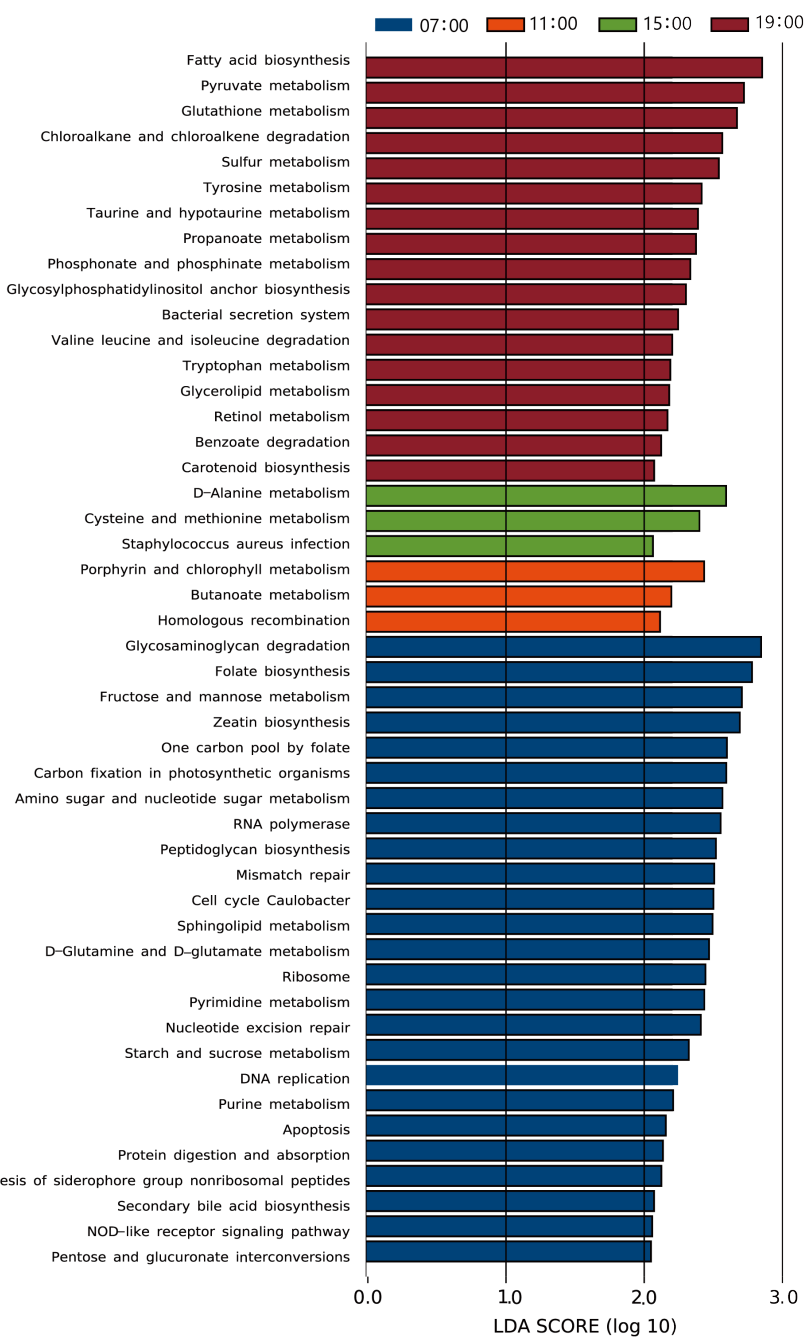

B

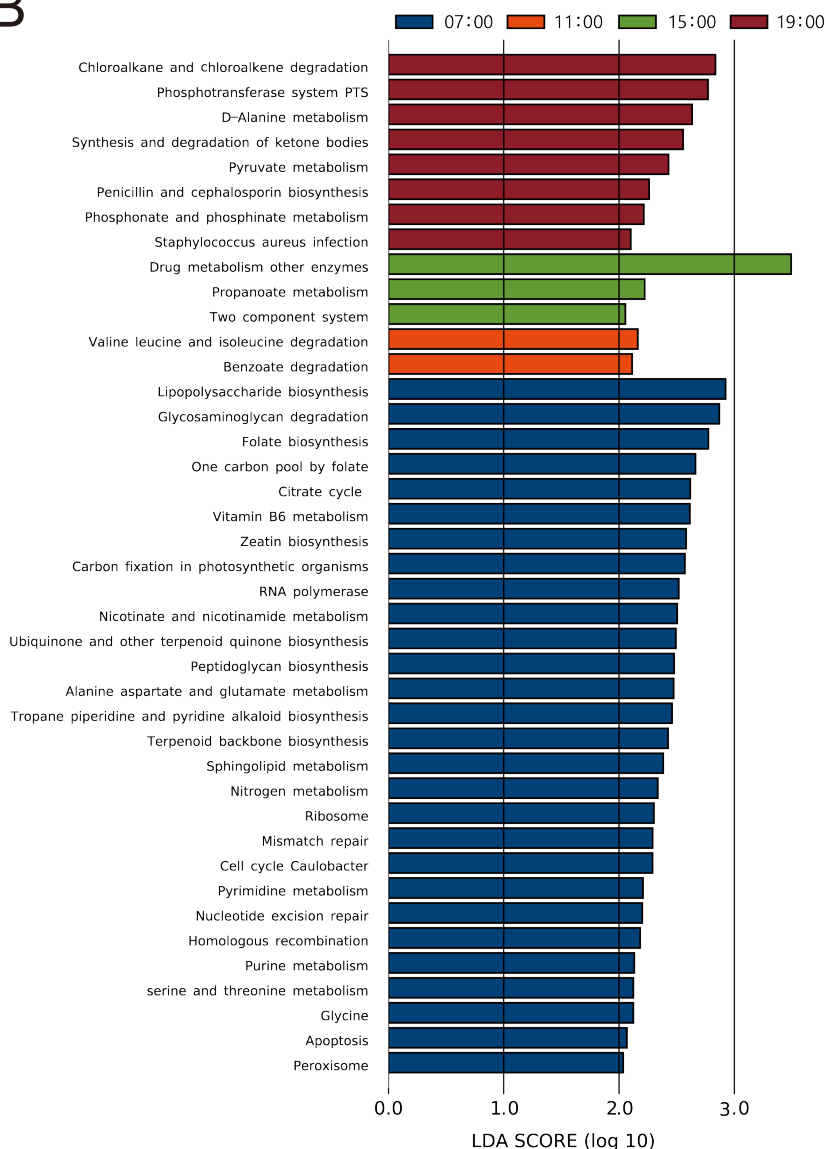

Supplement: DataSheet_4.pdf [file DataSheet_4.pdf]
